# Supplementary material for: Fibrinogen-like protein 2 controls sepsis catabasis by interacting with resolvin Dp5
Source: PubMed Central journal article supplement — Sci Adv. 2019 Nov 13;5(11):eaax0629. doi: 10.1126/sciadv.aax0629 (PMC6853772; doi:10.1126/sciadv.aax0629), 2019-11-13
Supplement: aax0629_SM.pdf [file aax0629_SM.pdf]

## Supplementary Materials for

### Fibrinogen-like protein 2 controls sepsis catabasis by interacting with resolvin Dp5

Yu Zhou, Juan Lei, Qichao Xie, Lei Wu, Shengwei Jin, Bo Guo, Xiang Wang, Guifang Yan, Qi Zhang, Huakan Zhao, Jiangang Zhang, Xiao Zhang, Jingchun Wang, Jiaqi Gu, Xiaoli Liu, Duyun Ye, Hongming Miao\*, Charles N. Serhan\*, Yongsheng Li\*

\*Corresponding author. Email: hongmingmiao@sina.com (H.M.); cserhan@bwh.harvard.edu (C.N.S.); yli@tmmu.edu.cn (Y.L.)

Published 13 November 2019, *Sci. Adv.* **5**, eaax0629 (2019)  
DOI: 10.1126/sciadv.aax0629

#### This PDF file includes:

Table S1. Characteristics of patients.

Table S2. The predicted binding free energy components for the ALX/FPR2-RvDp5 and ALX/FPR2-LXA<sub>4</sub> complexes using the MM/PBSA method.

Fig. S1. Inflammation profiles in SL versus DR inflammation.

Fig. S2. Fgl2 expression is regulated by miR-4661 and metalloproteinases.

Fig. S3. Deficiency of Fgl2 promotes inflammation initiation and delays resolution.

Fig. S4. Fgl2 deficiency reduces RvDp5 production.

Fig. S5. Fgl2 regulates PMN apoptosis and phagocytes of MΦs.

Fig. S6. An overview of binding modes for the four isomers of RvDp5 and LXA<sub>4</sub> in the binding pocket of ALX/FPR2.

Fig. S7. RvDp5 modulates Fgl2 and improves sepsis survival.

**Table S1. Characteristics of patients.** WBC, white blood cells; CRP, C-reactive protein; PCT, procalcitonin; PLT, platelet; PT, Prothrombin time; INR, International Normalized Ratio; FIB, fibrinogen; TT, thrombin time; APTT, activated partial thromboplastin time.

| Control              |        |     |                                         |                  |       |       |          |         |      |     |     |      |     |       |  |
|----------------------|--------|-----|-----------------------------------------|------------------|-------|-------|----------|---------|------|-----|-----|------|-----|-------|--|
| Samples              | Sex    | Age | Etiology                                | APACHE II scores | CRP   | PCT   | Creatine | Lactate | PT   | INR | FIB | TT   | DD  | APTT  |  |
| n1                   | Male   | 48  | Healthy                                 | 7                | 5.3   | 3.41  | 42       | 1.1     | 10.3 | 1.1 | 2.1 | 13.0 | 2.5 | 28.35 |  |
| n2                   | Male   | 30  | Healthy                                 | 5                | 2.2   | 5.29  | 57       | 0.5     | 10.5 | 1.5 | 3.0 | 13.5 | 3.8 | 26.53 |  |
| n3                   | Male   | 59  | Healthy                                 | 8                | 3.4   | 11.03 | 59       | 0.9     | 11.6 | 1.3 | 3.4 | 16.8 | 4.7 | 28.79 |  |
| n4                   | Male   | 33  | Healthy                                 | 5                | 3.8   | 3.55  | 74       | 0.8     | 12.3 | 1.7 | 2.6 | 16.1 | 3.4 | 30.02 |  |
| n5                   | Male   | 49  | Healthy                                 | 7                | 7.6   | 6.46  | 59       | 1.3     | 12.8 | 1.4 | 1.9 | 16.7 | 3.3 | 26.57 |  |
| n6                   | Male   | 52  | Healthy                                 | 7                | 5.5   | 2.07  | 68       | 2.2     | 13.3 | 1.4 | 2.2 | 15.9 | 4.5 | 27.44 |  |
| n7                   | Female | 54  | Healthy                                 | 7                | 8.1   | 1.08  | 73       | 1.4     | 13.2 | 1.3 | 3.1 | 16.4 | 6.3 | 25.76 |  |
| n8                   | Female | 47  | Healthy                                 | 6                | 7.0   | 1.55  | 82       | 1.2     | 10.9 | 1.5 | 3.5 | 17.5 | 4.6 | 29.45 |  |
| n9                   | Female | 43  | Healthy                                 | 5                | 3.5   | 3.82  | 79       | 0.6     | 11.5 | 1.9 | 2.7 | 15.6 | 4.1 | 35.84 |  |
| n10                  | Female | 56  | Healthy                                 | 8                | 6.4   | 3.17  | 68       | 0.8     | 11.9 | 1.4 | 2.6 | 16.8 | 3.2 | 32.71 |  |
| n11                  | Female | 51  | Healthy                                 | 7                | 2.3   | 2.86  | 82       | 0.7     | 12.4 | 1.6 | 3.5 | 16.7 | 5.5 | 33.15 |  |
| n12                  | Female | 42  | Healthy                                 | 5                | 7.5   | 2.22  | 77       | 1.3     | 13.1 | 1.0 | 2.4 | 13.9 | 6.1 | 30.94 |  |
|                      |        |     |                                         |                  |       |       |          |         |      |     |     |      |     |       |  |
|                      |        |     |                                         |                  |       |       |          |         |      |     |     |      |     |       |  |
| Sepsis Survivors     |        |     |                                         |                  |       |       |          |         |      |     |     |      |     |       |  |
| Samples              | Sex    | Age | Etiology                                | APACHE II scores | CRP   | PCT   | Creatine | Lactate | PT   | INR | FIB | TT   | DD  | APTT  |  |
| n1                   | Male   | 29  | Klebsiella pneumoniae                   | 16               | 12.5  | 3.30  | 15       | 2.3     | 12.5 | 1.5 | 1.5 | 16.9 | 0.8 | 29.63 |  |
| n2                   | Male   | 33  | Staphylococcus aureus                   | 18               | 43.8  | 41.40 | 28       | 6.5     | 13.6 | 1.2 | 2.7 | 19.5 | 1.9 | 46.52 |  |
| n3                   | Male   | 37  | Streptococcus pneumoniae                | 19               | 49.3  | 12.50 | 19       | 4.8     | 19.9 | 1.4 | 4.4 | 19.8 | 9.7 | 36.72 |  |
| n4                   | Male   | 39  | Staphylococcus aureus                   | 21               | 121.2 | 18.50 | 33       | 9.1     | 15.3 | 1.6 | 3.3 | 17.5 | 6.5 | 38.45 |  |
| n5                   | Male   | 52  | Enterobacter aerogenes                  | 24               | 97.5  | 16.90 | 59       | 5.3     | 16.8 | 1.7 | 5.8 | 17.3 | 4.3 | 33.91 |  |
| n6                   | Male   | 62  | Candida albicans                        | 23               | 185.4 | 22.70 | 54       | 3.7     | 17.9 | 1.3 | 6.7 | 19.2 | 4.2 | 42.83 |  |
| n7                   | Female | 60  | Escherichia coli                        | 24               | 135.3 | 32.60 | 38       | 3.9     | 14.5 | 1.0 | 7.2 | 19.1 | 3.5 | 40.61 |  |
| n8                   | Female | 42  | Haemophilus                             | 19               | 121.7 | 49.80 | 43       | 5.8     | 16.3 | 1.4 | 3.7 | 18.4 | 2.9 | 41.72 |  |
| n9                   | Female | 43  | Candida albicans                        | 18               | 163.5 | 50.30 | 42       | 4.3     | 18.1 | 1.5 | 8.3 | 18.6 | 6.4 | 30.91 |  |
| n10                  | Female | 51  | Streptococcus pneumoniae                | 21               | 124.7 | 21.80 | 31       | 5.5     | 16.6 | 1.6 | 6.5 | 17.8 | 8.1 | 42.40 |  |
| n11                  | Female | 58  | Escherichia coli                        | 20               | 115.9 | 15.67 | 94       | 6.1     | 14.8 | 1.8 | 7.5 | 20.3 | 7.8 | 43.65 |  |
| n12                  | Female | 47  | Candida albicans                        | 22               | 87.8  | 30.41 | 72       | 7.4     | 16.4 | 1.3 | 7.8 | 19.8 | 6.9 | 49.88 |  |
|                      |        |     |                                         |                  |       |       |          |         |      |     |     |      |     |       |  |
|                      |        |     |                                         |                  |       |       |          |         |      |     |     |      |     |       |  |
| Sepsis non-survivors |        |     |                                         |                  |       |       |          |         |      |     |     |      |     |       |  |
| Samples              | Sex    | Age | Etiology                                | APACHE II scores | CRP   | PCT   | Creatine | Lactate | PT   | INR | FIB | TT   | DD  | APTT  |  |
| n1                   | Male   | 33  | Pseudomonas aeruginosa                  | 23               | 43.5  | 0.90  | 63       | 6.7     | 13.1 | 1.3 | 2.2 | 17.4 | 0.9 | 38.81 |  |
| n2                   | Male   | 59  | Pseudomonas aeruginosa                  | 29               | 148.0 | 1.50  | 78       | 2.5     | 15.8 | 1.7 | 3.5 | 18.3 | 1.5 | 39.50 |  |
| n3                   | Male   | 46  | Acinetobacter baumannii                 | 31               | 57.0  | 1.30  | 62       | 3.4     | 20.3 | 1.1 | 3.7 | 19.6 | 3.3 | 47.53 |  |
| n4                   | Male   | 49  | Acinetobacter baumannii                 | 30               | 66.3  | 6.70  | 85       | 5.8     | 16.7 | 1.4 | 5.9 | 20.1 | 4.2 | 58.19 |  |
| n5                   | Male   | 44  | Haemophilus                             | 27               | 65.8  | 5.90  | 33       | 10.3    | 15.5 | 1.5 | 6.6 | 17.8 | 3.8 | 59.22 |  |
| n6                   | Male   | 53  | Klebsiella pneumoniae                   | 25               | 111.7 | 4.80  | 95       | 15.2    | 14.8 | 1.8 | 4.3 | 16.8 | 5.1 | 48.64 |  |
| n7                   | Female | 51  | Acinetobacter baumannii                 | 33               | 124.5 | 3.30  | 121      | 12.1    | 16.9 | 1.2 | 3.8 | 19.5 | 4.4 | 46.90 |  |
| n8                   | Female | 57  | Streptococcus pneumoniae                | 36               | 103.5 | 0.86  | 88       | 6.2     | 22.1 | 1.2 | 4.2 | 20.5 | 3.5 | 52.63 |  |
| n9                   | Female | 52  | Streptococcus equi subsp. zooepidemicus | 27               | 69.7  | 3.27  | 63       | 5.1     | 25.3 | 1.6 | 5.2 | 19.4 | 2.2 | 50.71 |  |
| n10                  | Female | 54  | Enterobacter aerogenes                  | 29               | 58.7  | 1.85  | 58       | 3.4     | 18.4 | 1.5 | 3.7 | 19.5 | 6.4 | 39.44 |  |
| n11                  | Female | 49  | Candida albicans                        | 26               | 76.5  | 1.21  | 61       | 2.9     | 17.1 | 1.3 | 4.8 | 17.9 | 3.1 | 37.89 |  |
| n12                  | Female | 37  | Staphylococcus aureus                   | 25               | 63.4  | 3.44  | 44       | 8.5     | 13.5 | 1.2 | 5.1 | 16.7 | 2.7 | 46.51 |  |

**Table S2. The predicted binding free energy components for the ALX/FPR2-RvDp5 and ALX/FPR2-LXA<sub>4</sub> complexes using the MM/PBSA method.**

| Component <sup>a</sup>   | RvDp5        |               |               |              | LXA <sub>4</sub> |               |               |               |
|--------------------------|--------------|---------------|---------------|--------------|------------------|---------------|---------------|---------------|
|                          | ZINC35876753 | ZINC35876755  | ZINC35876757  | ZINC35876759 | ZINC03873139     | ZINC04556658  | ZINC04556659  | ZINC04556660  |
| $\Delta E_{\text{vdw}}$  | -54.52±3.35  | -49.08±2.65   | -49.17±2.61   | -42.85±3.50  | -44.78±3.05      | -39.85±2.80   | -37.86±3.59   | -40.46±2.65   |
| $\Delta E_{\text{ele}}$  | -205.19±8.32 | -214.55±10.87 | -195.76±20.61 | -195.91±7.39 | -231.04±8.65     | -271.79±12.12 | -273.88±11.40 | -214.72±13.65 |
| $\Delta E_{\text{GB}}$   | 81.45±5.50   | 90.52±9.27    | 89.97±14.47   | 72.25±5.58   | 104.02±5.57      | 110.13±9.86   | 112.51±6.88   | 79.99±8.72    |
| $\Delta E_{\text{surf}}$ | -6.01±0.21   | -6.23±0.19    | -6.37±0.17    | -5.44±0.22   | -5.29±0.16       | -5.76±0.19    | -5.65±0.25    | -5.04±0.18    |
| $\Delta G_{\text{bind}}$ | -184.28±3.35 | -179.34±5.59  | -161.33±8.16  | -171.95±5.09 | -177.09±7.68     | -207.27±5.55  | -204.89±5.80  | -180.24±6.09  |

<sup>a</sup> **Component:**  $\Delta E_{\text{vdw}}$ : van der Waals energy contribution from MM;  $\Delta E_{\text{ele}}$ : electrostatic energy in the gas phase as calculated by the MM force field;  $\Delta E_{\text{GB}}$ : the electrostatic contribution to the solvation free energy calculated by GB;  $\Delta E_{\text{surf}}$ : nonpolar contribution to the solvation free energy calculated by solvent-accessible surface area (SASA);  $\Delta G_{\text{bind}}$ : final estimated binding free energy calculated from the terms mentioned above.

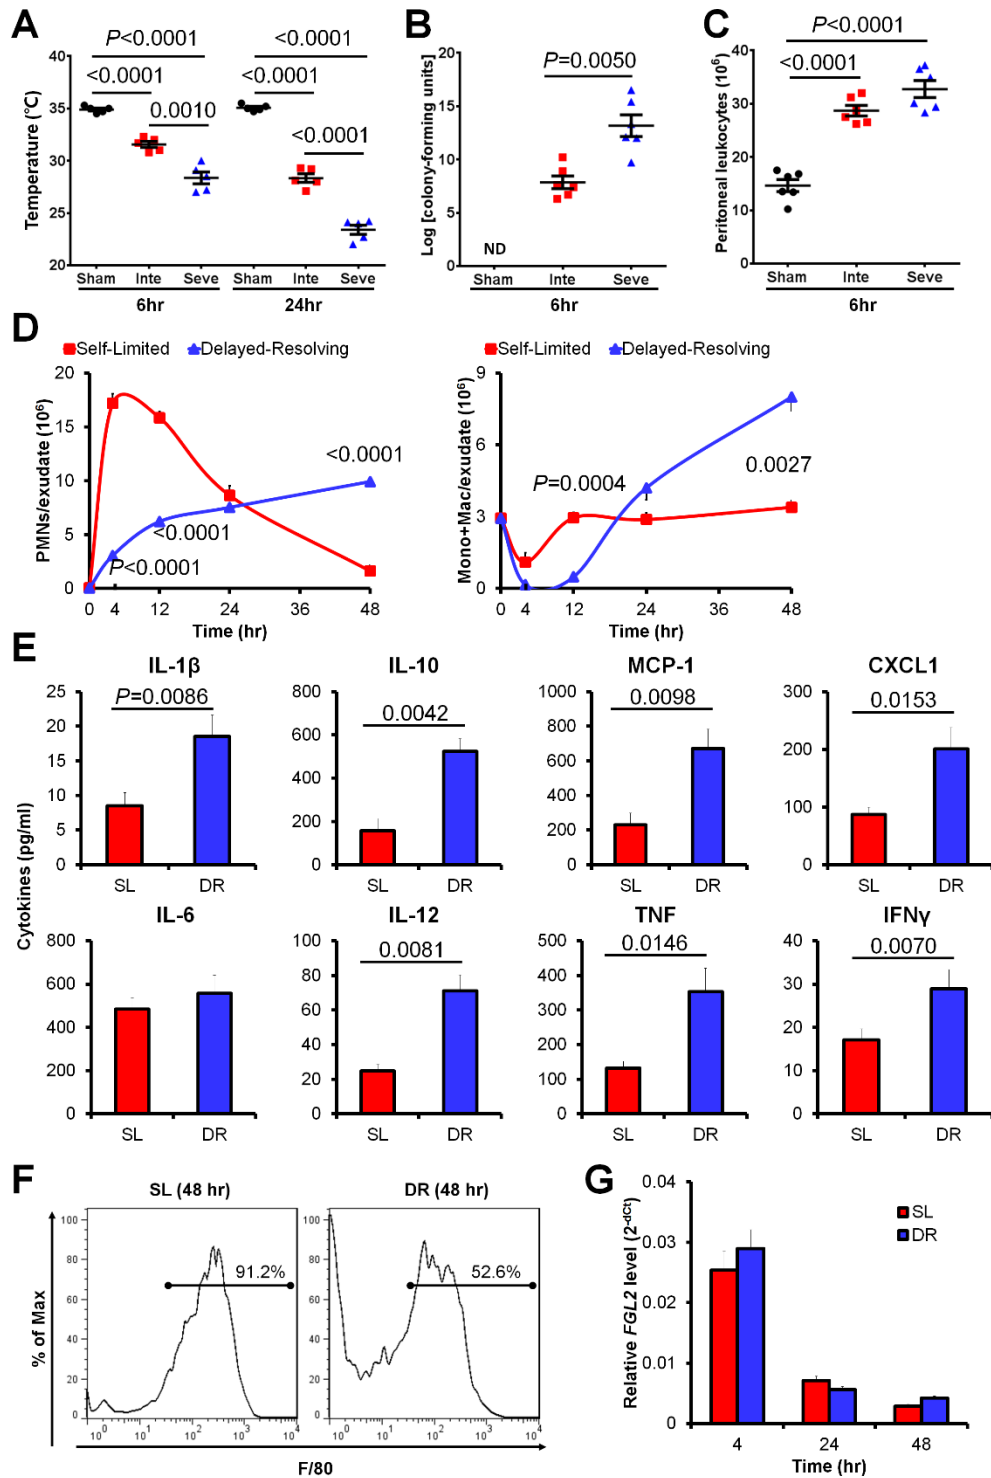

**Fig. S1. Inflammation profiles in SL versus DR inflammation.** (A to C) Mice ( $n=4\sim 6$ ) were induced different severity grades of sepsis by CLP. Temperature (A), aerobic bacteria levels in blood (B), peripheral leukocyte numbers (C) at indicated intervals. Inte, intermediate; Seve, severe. (D) PMN and mononuclear cells (monocytes and M $\Phi$ s) in exudates of SL and DR peritonitis ( $n=3\sim 7$ ). (E) Inflammatory cytokine levels at 4 hr in SL and DR exudates ( $n=4$ ). (F) F4/80 $^+$  M $\Phi$  percentages in the SL and DR exudates at 48 hr. (G) Fgl2 mRNA in SL and DR exudate leukocytes at 4, 24 and 48 hr ( $n=3\sim 7$ ). Error bars represent mean  $\pm$  S.E.M.

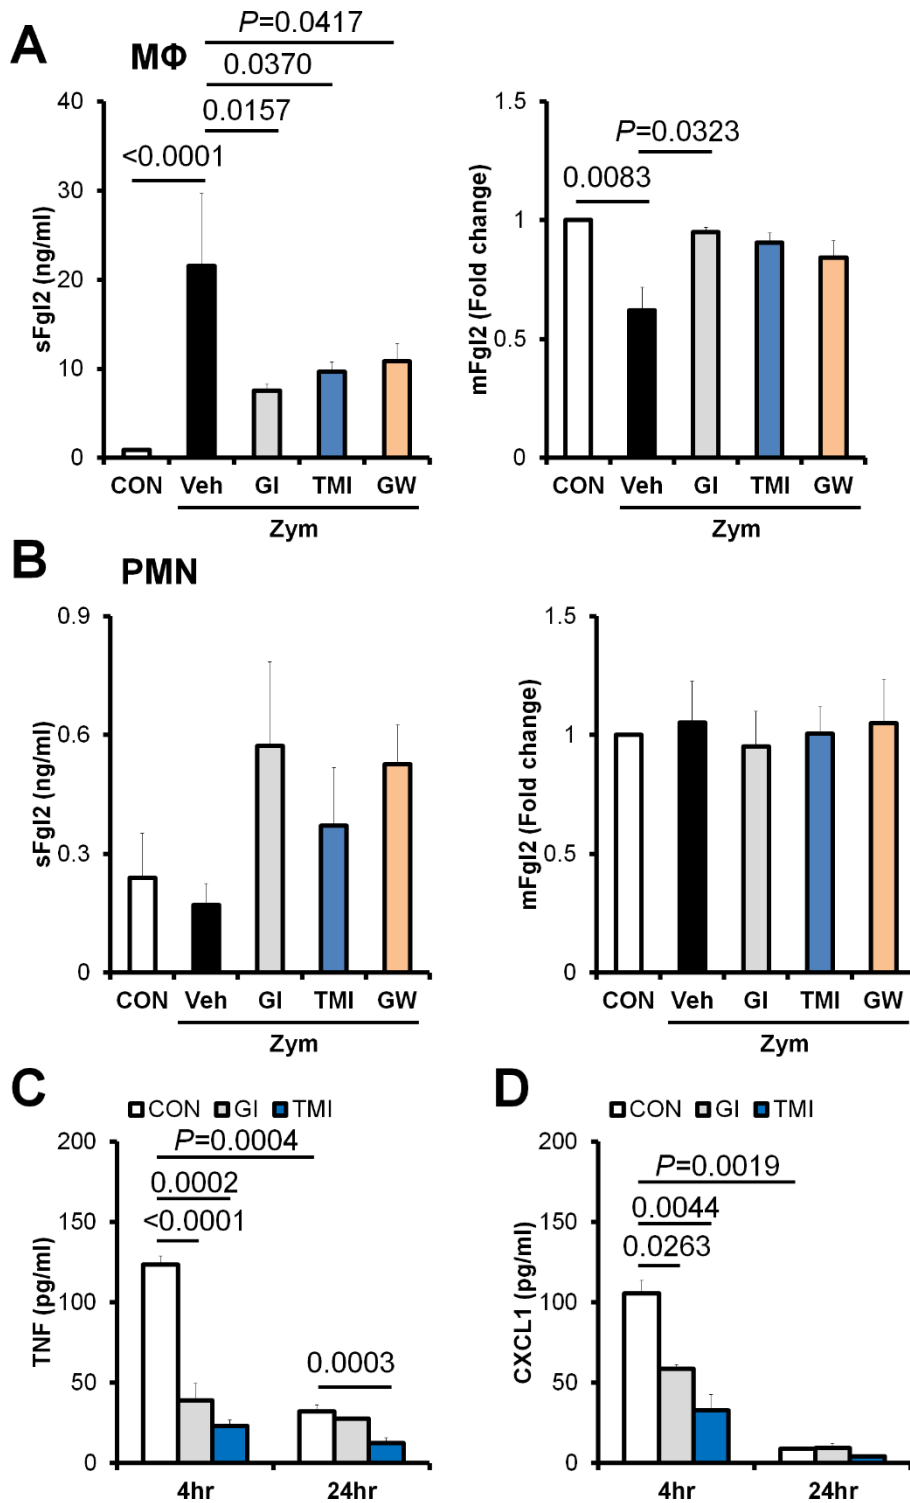

**Fig. S2. Fgl2 expression is regulated by miR-466l and metalloproteinases.** (A and B) Mouse bone marrow-derived MΦs (A) and PMNs (B) were treated with PBS, Zym (10 μM), with/without GI254023X, TMI-1 or GW280264X (10 μM each) for 24 hrs (MΦs) and 4 hrs (PMNs) respectively, sFgl2 and mFgl2 expression were assessed (n=3~5). (C and D) Mice were challenged *i.p.* with PBS (Veh), GI254023X (40 μg/kg), or TMI-1 (40 μg/kg), plus Zym (1 mg/mouse; n=4), the peritoneal exudate TNF (C) and CXCL1 (D) were determined with ELISA. Error bars represent mean ± S.E.M.

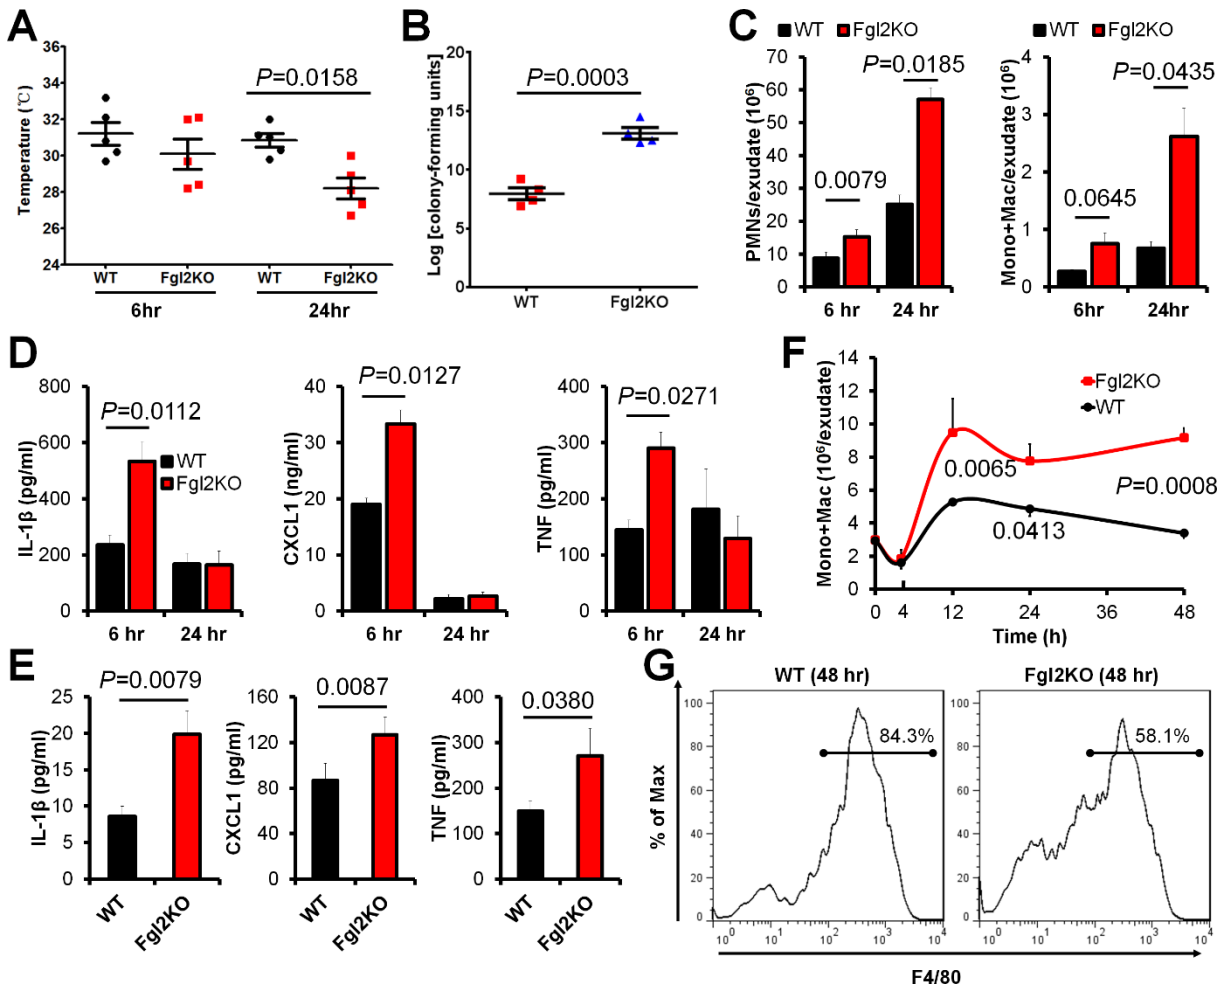

**Fig. S3. Deficiency of Fgl2 promotes inflammation initiation and delays resolution.** (A to D) Temperature (A), blood aerobic bacteria levels (B), peritoneal recruitment of PMN and mononuclear cells (C) and cytokine levels (D) in WT and Fgl2KO mice challenged with moderate CLP (n=3~5). (E to G) WT and Fgl2KO mice were challenged with Zym (1mg; *i.p.*). (E) Exudate cytokine levels (n=4). (F) Peritoneal mononuclear cell numbers at indicated intervals (n=4~13). (G) Peritoneal F4/80 $^+$  macrophage percentage at 48 hr (n=4). Error bars represent mean  $\pm$  S.E.M.

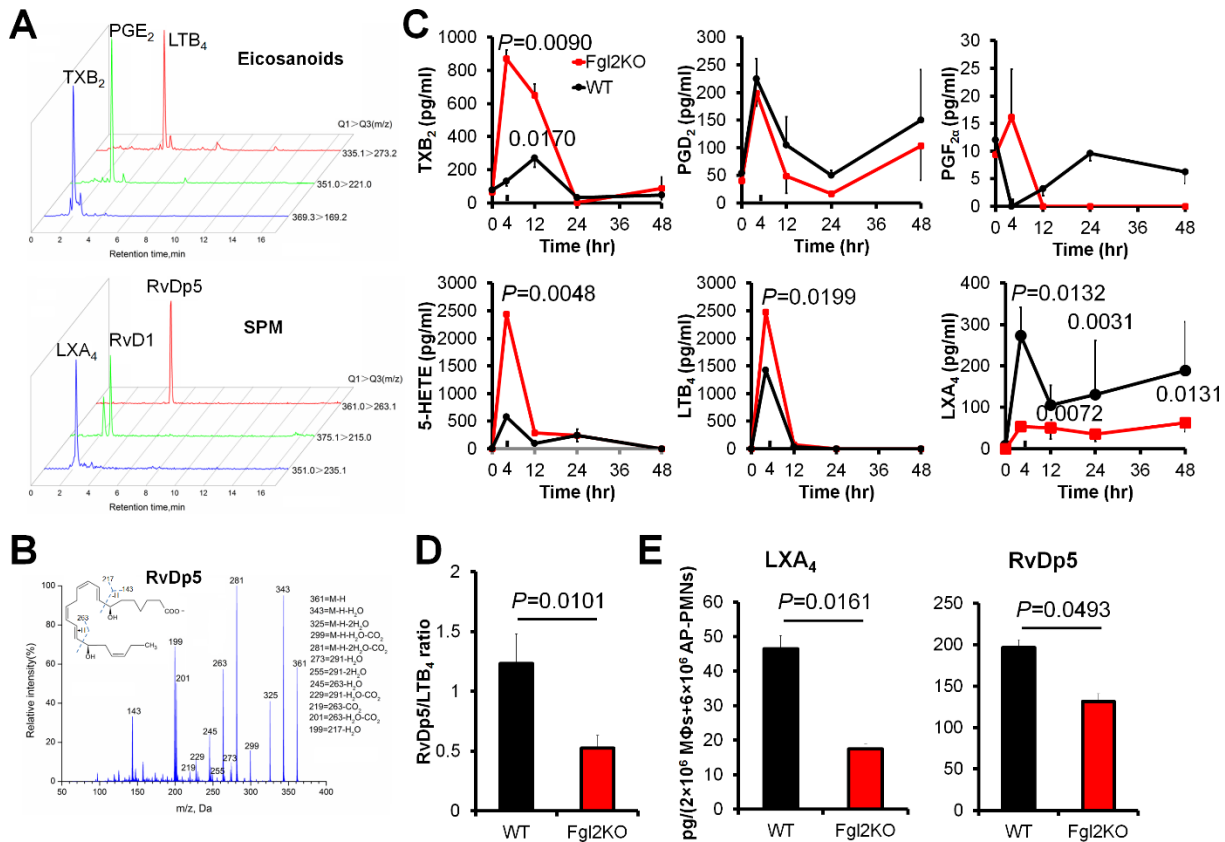

**Fig. S4. Fgl2 deficiency reduces RvDp5 production.** (A to D) WT and Fgl2KO mice were challenged with Zym (1mg; *i.p.*). Exudate LMs were identified and quantified by LC-MS-MS-based LM metabololipidomics. Representative multiple-reaction monitoring chromatograms (from three independent experiments) show the elution times for the identified bioactive LMs: Q1, M-H (parent ion); and Q3, diagnostic ion in the tandem mass spectrometry (MS/MS) (daughter ion) (A). MS/MS spectrum employed for the identification of RvDp5 (B). LM levels at indicated intervals (C). Ratios of SPM to pro-inflammatory LTB<sub>4</sub> (D). (E) Murine MΦs ( $2 \times 10^6$ ) were co-cultured with apoptotic PMNs ( $6 \times 10^6$ ) for 30 min, the cells and supernatants ( $n=4$ ) were collected for determination of LXA<sub>4</sub> and RvDp5 with UPLC-MS/MS. Error bars represent mean  $\pm$  S.E.M.

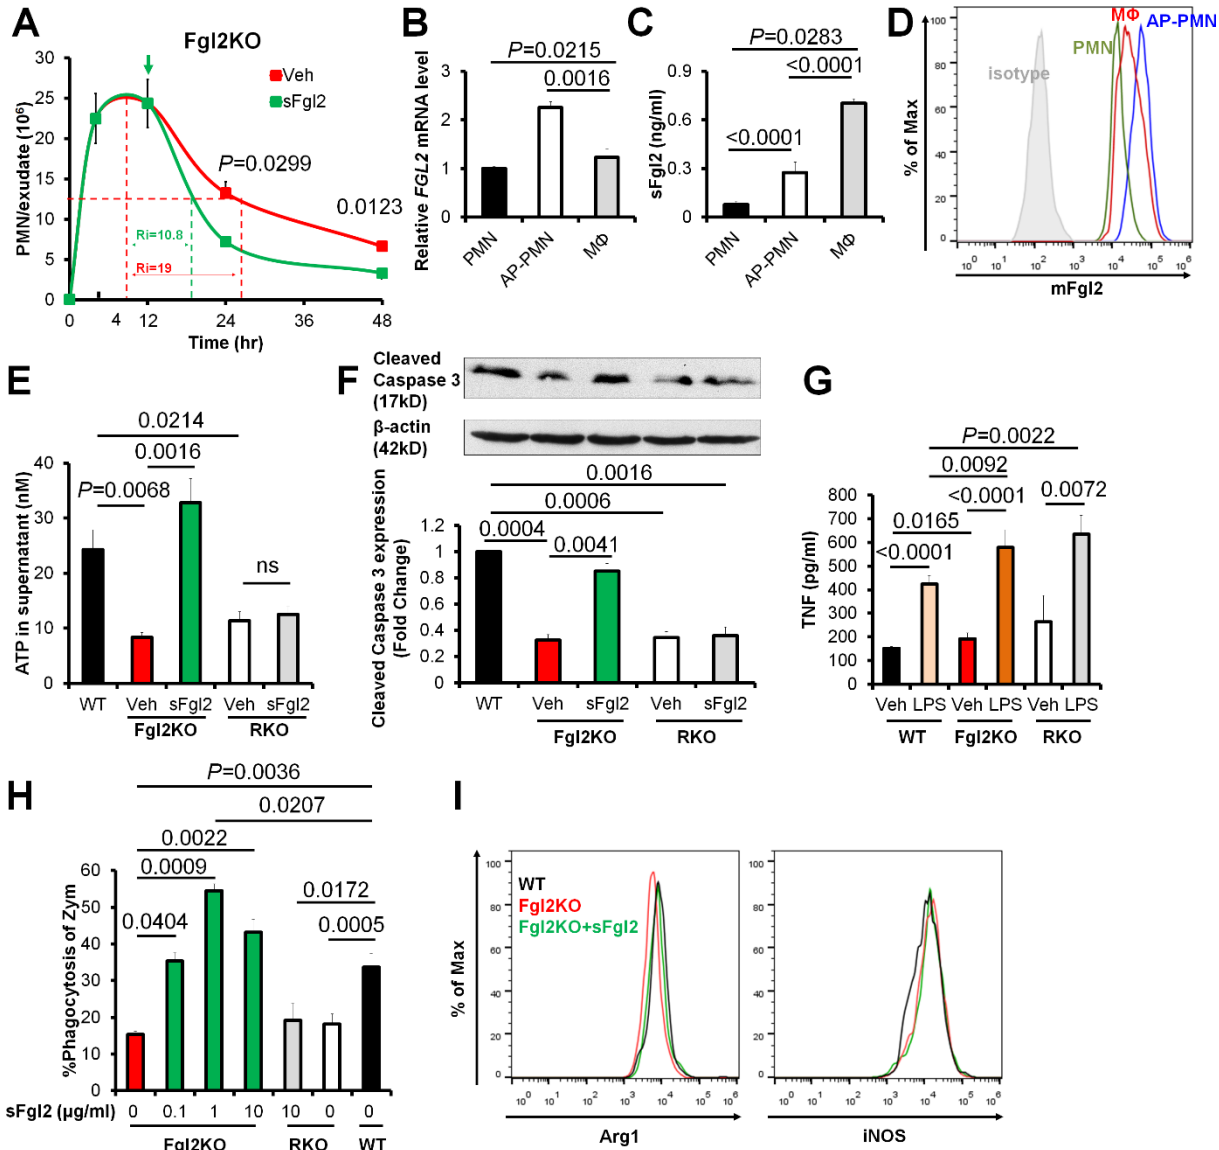

**Fig. S5. Fgl2 regulates PMN apoptosis and phagocytes of MΦs.** (A) Fgl2KO mice were injected *i.p.* with PBS (veh) or sFgl2 (200ng) at 12 hr post Zym (1 mg) intraperitoneal challenge for calculation of resolution intervals (n=3~13). (B to D) Murine BMDNs (PMNs), apoptotic PMNs (AP-PMN; PMNs cultured *in vitro* for 12 hrs) and MΦs were incubated in RPMI-1640 medium (10% FBS) for 4 hrs. The mRNA levels of *FGL2* (n=5~6) (B), protein expression of sFgl2 (in supernatants; n=3) (C) and macrophage mFgl2 (D) were determined with ELISA and FCM. (E) PMNs from WT, Fgl2KO and FcγRIIBKO (RKO) mice were induced apoptosis by UV for 2 hr with/without sFgl2 treatment (10μg/ml). ATP secretion was analyzed (n=4). (F) After treatment with/without sFgl2 (10 μg/ml) for 4 hrs, the expression of cleaved caspase 3 in PMNs from WT, Fgl2KO or FcγRIIB knockout (RKO) mice (n=4). (G) Murine peritoneal MΦs from WT, Fgl2KO and RKO mice were treated with/without LPS (1 μg/ml) for 4 hrs, the supernatant TNF were assessed with ELISA (n=3~5). (H) Murine peritoneal MΦs were isolated from WT, Fgl2KO (red and green) and FcγRIIBKO (RKO) mice and pretreated with/without sFgl2 for 2 hrs, and then were incubated with opsonized Zym (1:50) for 1 hr, fluorescence intensities were determined (n=4). (I) Murine peritoneal MΦs were isolated from WT or Fgl2KO mice, and then were treated with/without sFgl2 treatment (10 μg/ml) for 24 hrs, Arg1 and iNOS were assessed with FCM. Error bars represent mean ± S.E.M.



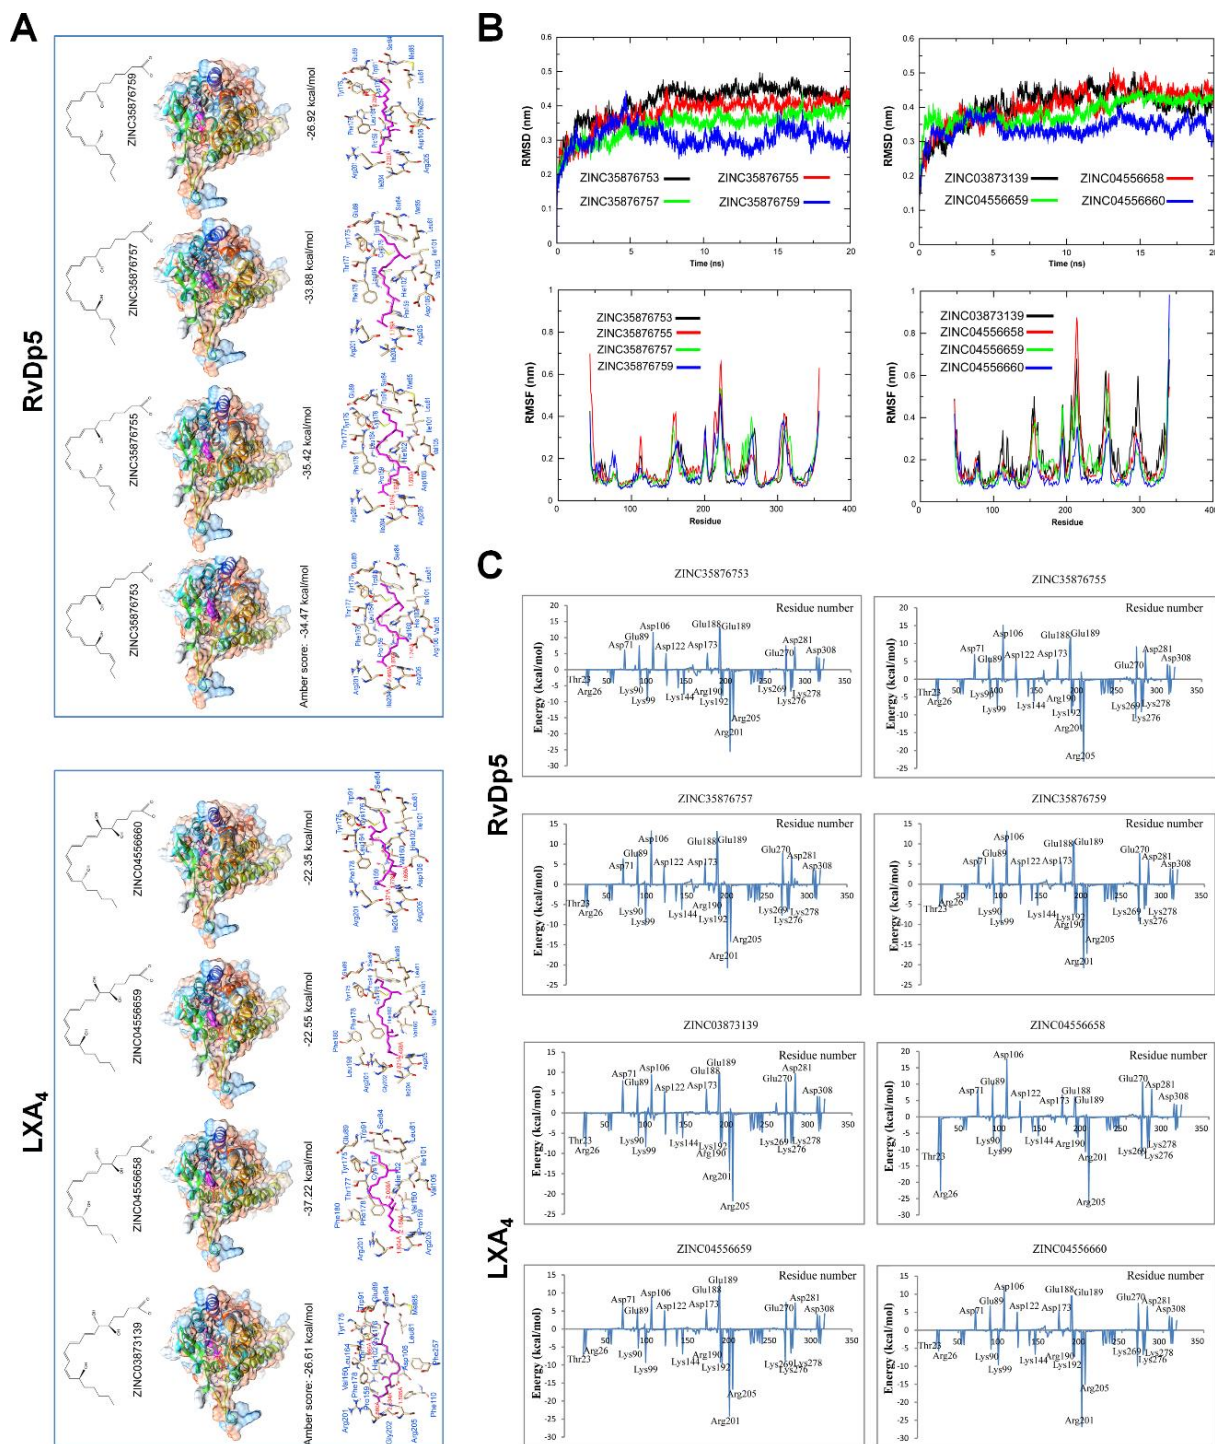

**Fig. S6. An overview of binding modes for the four isomers of RvDp5 and LXA<sub>4</sub> in the binding pocket of ALX/FPR2.** (A) Chemical structures of RvDp5 (ZINC35876753, ZINC35876755, ZINC35876757 and ZINC35876759 were isomers) and LXA<sub>4</sub> (ZINC03873139, ZINC04556658, ZINC04556659 and ZINC04556660 were isomers). 3D chart of RvDp5 and LXA<sub>4</sub> binding with ALX/FPR2, RvDp5 was colored in magenta. Binding mode of RvDp5 (ZINC35876753, ZINC35876755, ZINC35876757 and ZINC35876759) and LXA<sub>4</sub> (ZINC03873139, ZINC04556658, ZINC04556659 and ZINC04556660) in the binding pocket of ALX/FPR2, important amino acid residues are shown and the red lines indicate the hydrogen bonds formed in the corresponding residues. (B) RMSD and RMSF of the backbone atoms of ALX/FPR2-RvDp5 and ALX/FPR2-LXA<sub>4</sub> complexes with respect to the initial structure during 20 ns MD simulations. (C) Binding free energy decomposition of ALX/FPR2-RvDp5 and ALX/FPR2-LXA<sub>4</sub> complexes. Statistics source data for this figure are provided in table S2.

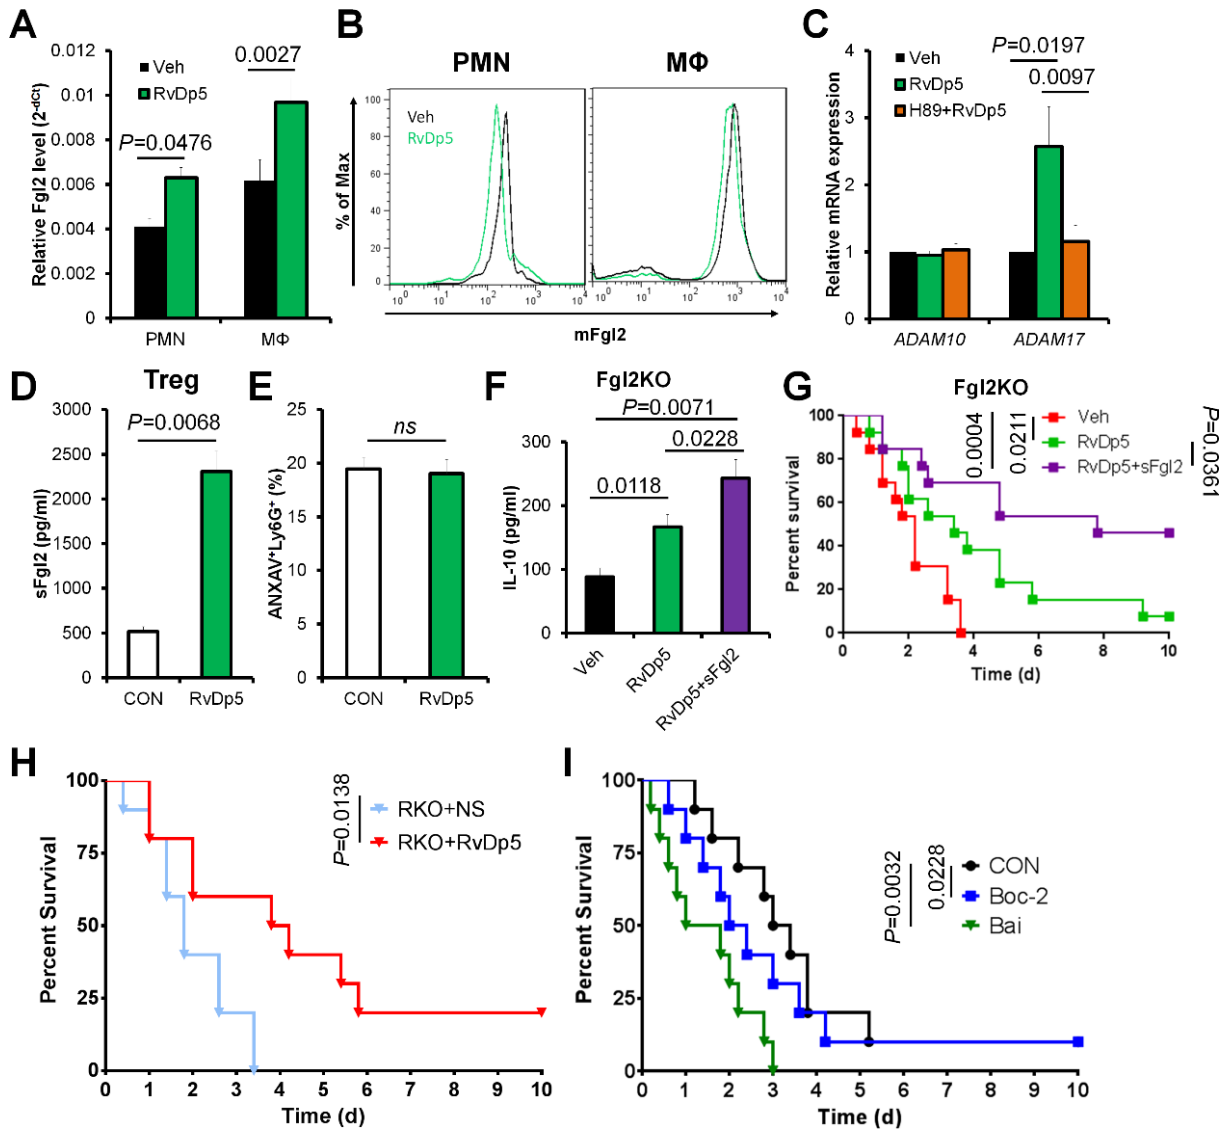

**Fig. S7. RvDp5 modulates Fgl2 and improves sepsis survival.** (A and B) Wildtype C57BL/6 mouse peripheral PMNs and peritoneal MΦs were treated with PBS (vehicle) or RvDp5 (10 nM) for 4 and 24 hrs respectively (n=4). The *FGL2* mRNA (A) and mFgl2 protein (B) were respectively assessed with qPCR and FCM. (C) After human MΦs were treated with PBS (Veh), RvDp5 (10 nM) with/without H89 (10 μM) for 24 hrs, the mRNA levels of ADAM10 and ADAM17 were assessed with qPCR (n=4). (D) Mouse spleen CD4<sup>+</sup>CD25<sup>+</sup> Tregs were treated with PBS (Control) or RvDp5 (10 nM) for 24 hrs, the supernatant sFgl2 were determined with ELISA (n=3). (E) Bone marrow-derived neutrophils (n=4) were treated with or without RvDp5 (10 nM) for 4 hrs, the apoptotic PMN (ANXAV<sup>+</sup>Ly6G<sup>+</sup>) was determined with flow cytometry, ns denotes no statistical significance. (F) After Fgl2KO mice were injected (*i.p.*) with Zym (1mg) with or without RvDp5 (200 ng) and/or sFgl2 (200 ng) for 4 hrs, the exudate IL-10 levels were detected with ELISA. (G) Survival rates of Fgl2KO mice (n=13 in each group) after challenged with CLP and treated (*i.v.*) with sFgl2 (400 ng) and/or RvDp5 (300 ng). Mantel-Cox test was applied for the *P* values. (H) Survival rates of CLP RKO mice (n=10 each group) after treatment with NS (0.9% Natrii Chloride) or RvDp5 (300 ng). Mantel-Cox test was applied for the *P* values. (I) Survival rates of CLP mice (n=10) after treatment with PBS, Boc-2 (N-t-Boc-Phe-Leu-Phe-Leu-Phe, GenScript USA Inc., Piscataway, NJ, USA; 10 μg/kg) or Bai (100 mg/kg) *i.v.* (n=10 in each group). Error bars represent mean ± S.E.M.
